# Supplementary material for: Molecular detection and genetic characterization of Arcobacter butzleri isolated from red-footed pet tortoises suspected for Campylobacter spp. from Grenada, West Indies
Source: PubMed Central journal article supplement (PMC7075591; doi:10.1371/journal.pone.0230390), 2020-03-16
Supplement: pone.0230390.s003.pdf [file pone.0230390.s003.pdf]

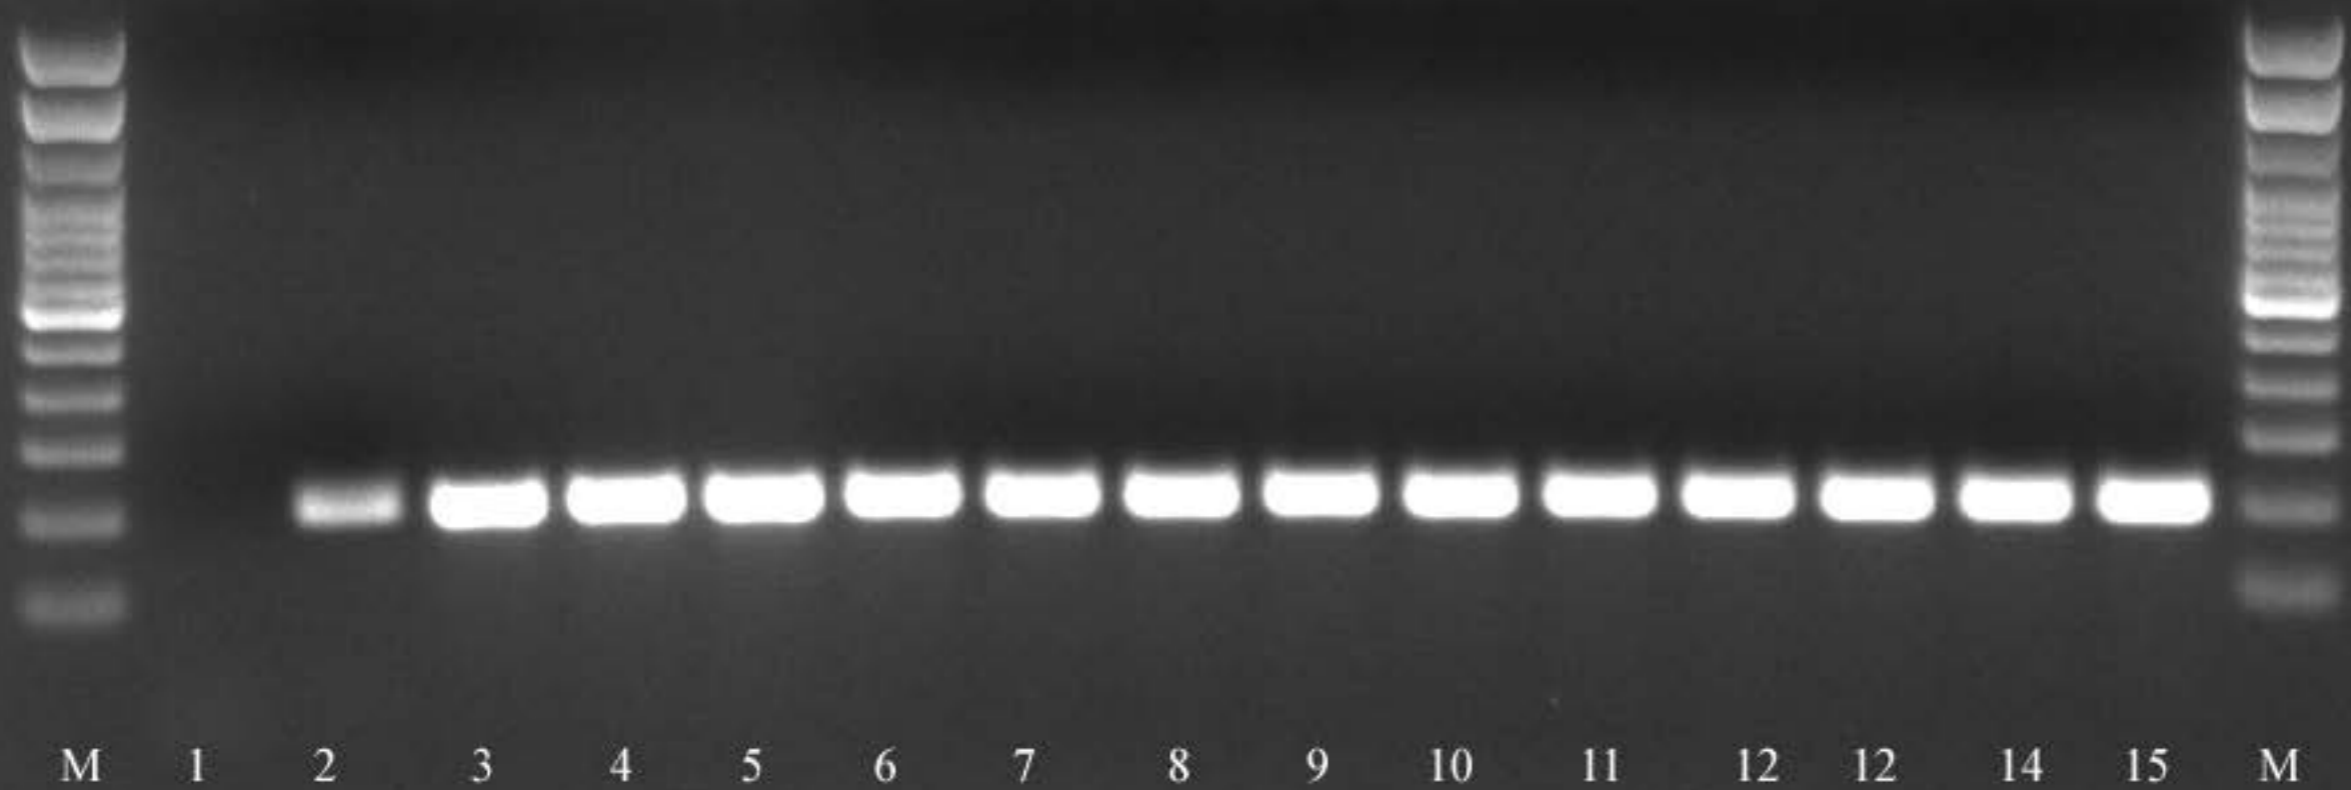

Raw image for Fig 3. Gel photograph of PCR using *A. butzleri* specific primer pair 16SArcobutzFw-16SArcobutzRv.

LaneM: Trackit 100bp ladder; Lane1: negative control (dH2O); Lane2: Reference strain (*C. jejuni* subsp. *jejuni* ATCC® 33291™); Lane3: T5; Lane4: T7; Lane5: T13.1; Lane6: T13.2; Lane7: T25.1; Lane8: T25.2; Lane9: T25.3; Lane10: T25.4; Lane11: T41.1; Lane12: T41.2; Lane13: T41.3; Lane14: T41.4; Lane15: T41.5
